# Supplementary material for: Solvent-controlled elongation and mechanochemical strain in a metal–organic framework
Source: Royal Society of Chemistry journal article supplement (doi:10.1039/d1dt01937f), 2021-01-01
Supplement: d1dt01937f1.pdf [file d1dt01937f1.pdf]

## Supporting Information: Anomalous compressibility of a chiral metal-organic framework

Aleksandra Półrolniczak,<sup>†1</sup> Szymon Sobczak,<sup>†1</sup> Varvara I. Nikolayenko,<sup>2</sup>  
Leonard J. Barbour,<sup>2\*</sup> Andrzej Katrusiak<sup>1\*</sup>

<sup>1</sup>Department of Materials Chemistry, Faculty of Chemistry, Adam Mickiewicz University,  
Uniwersytetu Poznańskiego 8, 61-614 Poznan, Poland, [katran@amu.edu.pl](mailto:katran@amu.edu.pl).

<sup>2</sup>Department of Chemistry, University of Stellenbosch, 7602, Matieland, Stellenbosch, South  
Africa. E-mail: [ljb@sun.ac.za](mailto:ljb@sun.ac.za)

<sup>†</sup>These authors contributed equally.

### High-pressure X-ray studies

High-pressure experiments were carried out in a Merrill-Bassett diamond-anvil cell (DAC), modified by mounting the diamond anvils directly on the steel support with conical windows.<sup>1</sup> The gasket was made of a pre-indented 0.3 mm thick steel foil, with a 0.4 mm spark-eroded hole. Glycerol, Daphne 7474 and a mixture of methanol, ethanol and water (in the ratio: 16:3:1),<sup>2</sup> were used as the pressure-transmitting media for compressing single crystals of DMOF. The pressure in the DAC was calibrated by the R1 ruby-line shift, measured by a Photon Control Spectrometer of enhanced resolution, affording an accuracy of 0.02 GPa.<sup>2,3</sup> The DAC was centred by the gasket-shadow method.<sup>4</sup> X-Ray diffraction data were measured with an Xcalibur Eos diffractometer and MoK $\alpha$  radiation. The high-pressure structures of DMOF were refined starting from its ambient-pressure model and using the full-matrix least squares method of SHELXL<sup>6</sup> within the Olex2 interface.<sup>7</sup> The final crystal data are summarised in Table 1 and in the SI. Owing to strongly disordered solvent molecules trapped in the pores of DMOF for all high-pressure measurements, the Platon subroutine SQUEEZE was applied.<sup>5</sup>

The structures have been deposited with the Cambridge Crystallographic Data Centre in the CIF format, no. 1956801-1956804, 1956866-1956870 for DMOF compressed in glycerol and 1956872-1956875 Daphne 7474 and 1956823-1956826, 1956193 for the structures compressed

in MEW. Copies of this information can be obtained free of charge from [www: http://www.ccdc.cam.ac.uk](http://www.ccdc.cam.ac.uk).

**Table S1.** Compressibility related to crystallographic axes between 0.1 MPa - 1.70 GPa calculated for  $(m\text{-btcp})_2(\text{bpdc})_2\text{Zn(II)}$  with Birch-Murnaghan Coefficients in non-penetrating

| Axes           | K(TPa <sup>-1</sup> ) | $\sigma$ K(TPa <sup>-1</sup> ) | Directions |   |   | Empirical parameters |             |         |        |
|----------------|-----------------------|--------------------------------|------------|---|---|----------------------|-------------|---------|--------|
|                |                       |                                | a          | b | c | $\epsilon_0$         | $\lambda$   | $P_c$   | $\nu$  |
| X <sub>1</sub> | 57.3464               | 6.3797                         | 1          | 0 | 0 | 1.4071e-02           | -4.7713e-02 | -0.4021 | 1.1658 |
| X <sub>2</sub> | 23.6407               | 4.7860                         | 0          | 0 | 1 | 1.1970e-03           | -2.6089e-02 | 0.0010  | 0.8826 |
| X <sub>3</sub> | -15.5525              | 3.1476                         | 0          | 1 | 0 | 5.4438e-03           | 1.0770e-02  | 0.0010  | 1.6833 |
| V              | 66.6108               | 2.4646                         |            |   |   |                      |             |         |        |

media: Daphne 7474 and glycerol.

### Birch-Murnaghan Coefficients

|                 | B <sub>0</sub> (GPa) | $\sigma$ B <sub>0</sub> (GPa) | V <sub>0</sub> (Å <sup>3</sup> ) | $\sigma$ V <sub>0</sub> (Å <sup>3</sup> ) | B'     | $\sigma$ B' | P <sub>c</sub> (GPa) |
|-----------------|----------------------|-------------------------------|----------------------------------|-------------------------------------------|--------|-------------|----------------------|
| 2 <sup>nd</sup> | 11.0507              | 0.7131                        | 5191.7321                        | 21.4783                                   | 4      | n/a         | 0                    |
| 3 <sup>rd</sup> | 13.1024              | 2.4939                        | 5172.8458                        | 26.4805                                   | 1.6482 | 2.4952      | 0                    |

**Table S2.** Compressibility related to crystallographic axes calculated for  $(m\text{-btcp})_2(\text{bpdc})_2\text{Zn(II)}$  with Birch-Murnaghan Coefficients in the mixture of methanol:ethanol:water, in pressure between two measurements 0.1 MPa and 1.18 GPa, with program PASCAL.<sup>6</sup>

| Axes           | K(TPa <sup>-1</sup> ) | $\sigma$ K(TPa <sup>-1</sup> ) | Direction |   |   | $\epsilon_0$ | Empirical parameters |         |         |
|----------------|-----------------------|--------------------------------|-----------|---|---|--------------|----------------------|---------|---------|
|                |                       |                                | a         | b | c |              | $\lambda$            | $P_c$   | $\nu$   |
| X <sub>1</sub> | 27.2332               | 6.5588                         | 0         | 1 | 0 | -3.9955e-02  | 7.6928e+01           | -3.2142 | -6.4130 |
| X <sub>2</sub> | 10.1260               | 5.4559                         | 1         | 0 | 0 | -6.2470e-04  | -1.4772e-03          | -0.4944 | 3.9832  |
| X <sub>3</sub> | -44.5916              | 2.6869                         | 0         | 0 | 1 | 9.3921e-01   | -8.8988e-01          | -0.0262 | -0.0163 |
| V              | -5.6106               | 589.1069                       |           |   |   |              |                      |         |         |

### Birch-Murnaghan Coefficients

|                 | B <sub>0</sub> (GPa) | $\sigma$ B <sub>0</sub> (GPa) | V <sub>0</sub> (Å <sup>3</sup> ) | $\sigma$ V <sub>0</sub> (Å <sup>3</sup> ) | B' | $\sigma$ B' | P <sub>c</sub> (GPa) |
|-----------------|----------------------|-------------------------------|----------------------------------|-------------------------------------------|----|-------------|----------------------|
| 2 <sup>nd</sup> | -181.2014            | 40.1061                       | 5146.4333                        | 1206.9104                                 | 4  | n/a         | 0                    |

### References

1. Merrill, L. & Bassett, W. A. Miniature diamond anvil pressure cell for single crystal x-ray diffraction studies. *Rev. Sci. Instrum.* **45**, 290–294 (1974).
2. Mao, H. K., Xu, J. & Bell, P. M. Calibration of the ruby pressure gauge to 800 kbar under quasi-hydrostatic conditions. *Journal of Geophysical Research* vol. 91 4673–4676 (1986).
3. Piermarini, G. J., Block, S., Barnett, J. D. & Forman, R. A. Calibration of the pressure dependence of the R1 ruby fluorescence line to 195 kbar. *J. Appl. Phys.* **46**, 2774–2780 (1975).
4. Budzianowski, A. & Katrusiak, A. High-Pressure Crystallographic Experiments with a

CCD-Detector. in *High-Pressure Crystallography* vol. 140 101–112 (Springer Netherlands, 2004).

5. Spek, A. L. PLATON SQUEEZE: A tool for the calculation of the disordered solvent contribution to the calculated structure factors. *Acta Crystallogr. Sect. C Struct. Chem.* **71**, 9–18 (2015).
6. Cliffe, M. J. & Goodwin, A. L. PASCAL: A principal-axis strain calculator for thermal expansion and compressibility determination. *J. Appl. Crystallogr.* **45**, 1321–1329 (2012).

**Table S3.** Detailed crystallographic data of DMOF compressed in glycerol with their deposited CCDC numbers.

| Pressure                                          | 0.10 GPa                                                                                       | 0.40 GPa                                                                                       | 0.50 GPa                                                                                       | 0.19 GPa    | 0.70 GPa                                                                                       | 0.45 GPa    | 0.80 GPa                                                                                       | 0.7 GPa     | 1.20 GPa                                                                                       | 0.9 GPa     | 1.35 GPa                                                                                       | 1.50 GPa                                                                                       | 1.70 GPa                                                                                       |
|---------------------------------------------------|------------------------------------------------------------------------------------------------|------------------------------------------------------------------------------------------------|------------------------------------------------------------------------------------------------|-------------|------------------------------------------------------------------------------------------------|-------------|------------------------------------------------------------------------------------------------|-------------|------------------------------------------------------------------------------------------------|-------------|------------------------------------------------------------------------------------------------|------------------------------------------------------------------------------------------------|------------------------------------------------------------------------------------------------|
| Hydrostatic medium                                | glycerol                                                                                       | glycerol                                                                                       | glycerol                                                                                       | Daphne 7474 | glycerol                                                                                       | glycerol                                                                                       | glycerol                                                                                       |
| CCDC numbers                                      | 1956803                                                                                        | 1956801                                                                                        | 1956804                                                                                        |             | 1956802                                                                                        |             | 1956870                                                                                        |             | 1956867                                                                                        |             | 1956869                                                                                        | 1956866                                                                                        | 1956868                                                                                        |
| Formula weight                                    | 828.09                                                                                         | 828.09                                                                                         | 828.09                                                                                         |             | 828.09                                                                                         |             | 828.09                                                                                         |             | 828.09                                                                                         |             | 828.09                                                                                         | 828.09                                                                                         | 828.09                                                                                         |
| Empirical formula                                 | C <sub>39</sub> H <sub>24</sub> F <sub>6</sub> N <sub>2</sub> O <sub>4</sub> S <sub>2</sub> Zn | C <sub>39</sub> H <sub>24</sub> F <sub>6</sub> N <sub>2</sub> O <sub>4</sub> S <sub>2</sub> Zn | C <sub>39</sub> H <sub>24</sub> F <sub>6</sub> N <sub>2</sub> O <sub>4</sub> S <sub>2</sub> Zn |             | C <sub>39</sub> H <sub>24</sub> F <sub>6</sub> N <sub>2</sub> O <sub>4</sub> S <sub>2</sub> Zn |             | C <sub>39</sub> H <sub>24</sub> F <sub>6</sub> N <sub>2</sub> O <sub>4</sub> S <sub>2</sub> Zn |             | C <sub>39</sub> H <sub>24</sub> F <sub>6</sub> N <sub>2</sub> O <sub>4</sub> S <sub>2</sub> Zn |             | C <sub>39</sub> H <sub>24</sub> F <sub>6</sub> N <sub>2</sub> O <sub>4</sub> S <sub>2</sub> Zn | C <sub>39</sub> H <sub>24</sub> F <sub>6</sub> N <sub>2</sub> O <sub>4</sub> S <sub>2</sub> Zn | C <sub>39</sub> H <sub>24</sub> F <sub>6</sub> N <sub>2</sub> O <sub>4</sub> S <sub>2</sub> Zn |
| Wavelength (Å)                                    | 0.71073                                                                                        | 0.71073                                                                                        | 0.71073                                                                                        |             | 0.71073                                                                                        |             | 0.71073                                                                                        |             | 0.71073                                                                                        |             | 0.71073                                                                                        | 0.71073                                                                                        | 0.71073                                                                                        |
| Crystal system                                    | orthorhombic                                                                                   | orthorhombic                                                                                   | orthorhombic                                                                                   |             | orthorhombic                                                                                   |             | orthorhombic                                                                                   |             | orthorhombic                                                                                   |             | orthorhombic                                                                                   | orthorhombic                                                                                   | orthorhombic                                                                                   |
| Space group                                       | <i>P</i> 2 <sub>1</sub> 2 <sub>1</sub> 2 <sub>1</sub>                                          | <i>P</i> 2 <sub>1</sub> 2 <sub>1</sub> 2 <sub>1</sub>                                          | <i>P</i> 2 <sub>1</sub> 2 <sub>1</sub> 2 <sub>1</sub>                                          |             | <i>P</i> 2 <sub>1</sub> 2 <sub>1</sub> 2 <sub>1</sub>                                          |             | <i>P</i> 2 <sub>1</sub> 2 <sub>1</sub> 2 <sub>1</sub>                                          |             | <i>P</i> 2 <sub>1</sub> 2 <sub>1</sub> 2 <sub>1</sub>                                          |             | <i>P</i> 2 <sub>1</sub> 2 <sub>1</sub> 2 <sub>1</sub>                                          | <i>P</i> 2 <sub>1</sub> 2 <sub>1</sub> 2 <sub>1</sub>                                          | <i>P</i> 2 <sub>1</sub> 2 <sub>1</sub> 2 <sub>1</sub>                                          |
| Unit cell dimensions                              | a (Å)                                                                                          | 7.033(3)                                                                                       | 6.9346(16)                                                                                     | 6.890(3)    | 6.8072(17)                                                                                     | 6.730(2)    | 6.638(6)                                                                                       | 6.555(8)    | 6.513(9)                                                                                       | 6.399(7)    |                                                                                                | 6.513(9)                                                                                       | 6.399(7)                                                                                       |
|                                                   | b (Å)                                                                                          | 25.167(15)                                                                                     | 25.153(13)                                                                                     | 25.19(2)    | 25.266(16)                                                                                     | 25.256(15)  | 25.42(3)                                                                                       | 25.56(3)    | 25.67(3)                                                                                       | 25.71(3)    |                                                                                                | 25.67(3)                                                                                       | 25.71(3)                                                                                       |
|                                                   | c (Å)                                                                                          | 29.00(4)                                                                                       | 28.98(2)                                                                                       | 28.95(3)    | 28.63(3)                                                                                       | 28.79(4)    | 28.23(8)                                                                                       | 28.14(7)    | 27.96(7)                                                                                       | 27.86(7)    |                                                                                                | 27.96(7)                                                                                       | 27.86(7)                                                                                       |
| Volume (Å <sup>3</sup> )                          | 5134(9)                                                                                        | 5055(5)                                                                                        | 5026(7)                                                                                        |             | 4924(6)                                                                                        |             | 4893(7)                                                                                        |             | 4762(16)                                                                                       |             | 4716(15)                                                                                       | 4675(14)                                                                                       | 4615(14)                                                                                       |
| Z/Z'                                              | 4/1                                                                                            | 4/1                                                                                            | 4/1                                                                                            |             | 4/1                                                                                            |             | 4/1                                                                                            |             | 4/1                                                                                            |             | 4/1                                                                                            | 4/1                                                                                            | 4/1                                                                                            |
| Molecular volume (V/Z)                            | 1283.5                                                                                         | 1263.75                                                                                        | 1256.5                                                                                         |             | 1231.0                                                                                         |             | 1223.25                                                                                        |             | 1190.5                                                                                         |             | 1179.0                                                                                         | 1168.75                                                                                        | 1153.75                                                                                        |
| Calculated density (g/cm <sup>3</sup> )           | 1.071                                                                                          | 1.088                                                                                          | 1.094                                                                                          |             | 1.117                                                                                          |             | 1.124                                                                                          |             | 1.155                                                                                          |             | 1.166                                                                                          | 1.176                                                                                          | -                                                                                              |
| Absorption (mm <sup>-1</sup> )                    | 0.613                                                                                          | 0.622                                                                                          | 0.626                                                                                          |             | 0.639                                                                                          |             | 0.643                                                                                          |             | 0.661                                                                                          |             | 0.667                                                                                          | 0.673                                                                                          | -                                                                                              |
| F(000)                                            | 1680.0                                                                                         | 1680.0                                                                                         | 1680.0                                                                                         |             | 1680.0                                                                                         |             | 1680.0                                                                                         |             | 1680.0                                                                                         |             | 1680.0                                                                                         | 1680.0                                                                                         | -                                                                                              |
| Crystal size (mm)                                 | 0.307 × 0.214 × 0.126                                                                          | 0.308 × 0.215 × 0.125                                                                          | 0.308 × 0.215 × 0.124                                                                          |             | 0.308 × 0.216 × 0.124                                                                          |             | 0.308 × 0.216 × 0.122                                                                          |             | 0.308 × 0.216 × 0.122                                                                          |             | 0.308 × 0.216 × 0.122                                                                          | 0.308 × 0.216 × 0.122                                                                          | 0.309 × 0.216 × 0.122                                                                          |
| 2θ-range for data collection (°)                  | 8.068 to 29.168                                                                                | 8.13 to 27.166                                                                                 | 7.956 to 51.194                                                                                |             | 8.208 to 29.406                                                                                |             | 8.254 to 34.44                                                                                 |             | 8.17 to 22.886                                                                                 |             | 8.228 to 20.448                                                                                | 8.268 to 20.314                                                                                | -                                                                                              |
| Min/max indices: h, k, l                          | -4/4, -17/17, -16/16                                                                           | -4/4, -15/15, -17/17                                                                           | -6/8, -22/19, -23/23                                                                           |             | -4/4, -16/16, -18/18                                                                           |             | -5/5, -20/20, -17/17                                                                           |             | -3/3, -13/13, -13/13                                                                           |             | -3/3, -12/12, -11/11                                                                           | -3/3, -12/12, -11/11                                                                           | -                                                                                              |
| Reflect. collected/unique                         | 9017/1405                                                                                      | 8705/1171                                                                                      | 4301/2130                                                                                      |             | 10158/1418                                                                                     |             | 14627/1987                                                                                     |             | 4271/622                                                                                       |             | 3011/438                                                                                       | 2763/417                                                                                       | -                                                                                              |
| R <sub>int</sub>                                  | 0.3847                                                                                         | 0.2726                                                                                         | 0.2156                                                                                         |             | 0.4441                                                                                         |             | 0.4867                                                                                         |             | 0.3085                                                                                         |             | 0.2840                                                                                         | 0.4812                                                                                         | -                                                                                              |
| Refinement method                                 | Full-matrix least-squares on F <sup>2</sup>                                                    |                                                                                                |                                                                                                |             |                                                                                                |             |                                                                                                |             |                                                                                                |             |                                                                                                |                                                                                                |                                                                                                |
| Completeness (%)                                  | 75                                                                                             | 75                                                                                             | 23                                                                                             |             | 76                                                                                             |             | 55                                                                                             |             | 73                                                                                             |             | 72                                                                                             | 71                                                                                             | -                                                                                              |
| Data/restraints/parameters                        | 1405/781/414                                                                                   | 1171/485/414                                                                                   | 2130/745/414                                                                                   |             | 1418/760/414                                                                                   |             | 1987/611/414                                                                                   |             | 622/204/106                                                                                    |             | 438/75/102                                                                                     | 417/128/107                                                                                    | -                                                                                              |
| Goodness-of-fit on F <sup>2</sup>                 | 1.180                                                                                          | 1.397                                                                                          | 0.915                                                                                          |             | 1.227                                                                                          |             | 1.028                                                                                          |             | 1.176                                                                                          |             | 1.096                                                                                          | 1.067                                                                                          | -                                                                                              |
| Final R <sub>1</sub> /wR <sub>2</sub> [(I>2σ(I))] | 0.1196/0.3102                                                                                  | 0.1125/0.2978                                                                                  | 0.0974/0.1962                                                                                  |             | 0.1273/0.3142                                                                                  |             | 0.1161/0.2770                                                                                  |             | 0.1168/0.2985                                                                                  |             | 0.1498/0.3469                                                                                  | 0.1431/0.3430                                                                                  | -                                                                                              |
| R <sub>1</sub> /wR <sub>2</sub> (all data)        | 0.1849/0.3718                                                                                  | 0.0734/0.3413                                                                                  | 0.2676/0.2827                                                                                  |             | 0.2030/0.3895                                                                                  |             | 0.2405/0.3690                                                                                  |             | 0.1569/0.3456                                                                                  |             | 0.1988/0.3943                                                                                  | 0.2106/0.4045                                                                                  | -                                                                                              |
| Largest diff. peak/hole (e Å <sup>-3</sup> )      | 0.25/-0.19                                                                                     | 0.24/-0.26                                                                                     | 0.14/-0.17                                                                                     |             | 0.29/-0.19                                                                                     |             | 0.23/-0.20                                                                                     |             | 0.15/-0.17                                                                                     |             | 0.25/-0.17                                                                                     | 0.09/-0.11                                                                                     | -                                                                                              |

$$w=1/(\sigma^2 F_o^2+w_1^2 * P^2+w_2 * P), \text{ where } P=(\text{Max}(F_o^2, 0)+2 * F_o^2)$$

**Table S4.** Detailed DMOF compressed in deposited CCDC numbers.

|                                                   |       |                                                                                                |                                                                                                |                                                                                                |                                                                                                |
|---------------------------------------------------|-------|------------------------------------------------------------------------------------------------|------------------------------------------------------------------------------------------------|------------------------------------------------------------------------------------------------|------------------------------------------------------------------------------------------------|
| CCDC numbers                                      |       | 1956873                                                                                        | 1956874                                                                                        | 1956875                                                                                        | 1956872                                                                                        |
| Formula weight                                    |       | 828.09                                                                                         | 828.09                                                                                         | 828.09                                                                                         | 828.09                                                                                         |
| Empirical formula                                 |       | C <sub>39</sub> H <sub>24</sub> F <sub>6</sub> N <sub>2</sub> O <sub>4</sub> S <sub>2</sub> Zn | C <sub>39</sub> H <sub>24</sub> F <sub>6</sub> N <sub>2</sub> O <sub>4</sub> S <sub>2</sub> Zn | C <sub>39</sub> H <sub>24</sub> F <sub>6</sub> N <sub>2</sub> O <sub>4</sub> S <sub>2</sub> Zn | C <sub>39</sub> H <sub>24</sub> F <sub>6</sub> N <sub>2</sub> O <sub>4</sub> S <sub>2</sub> Zn |
| Wavelength (Å)                                    |       | 0.71073                                                                                        | 0.71073                                                                                        | 0.71073                                                                                        | 0.71073                                                                                        |
| Crystal system                                    |       | orthorhombic                                                                                   | orthorhombic                                                                                   | orthorhombic                                                                                   | orthorhombic                                                                                   |
| Space group                                       |       | <i>P</i> 2 <sub>1</sub> 2 <sub>1</sub> 2 <sub>1</sub>                                          |
| Unit cell dimensions                              | a (Å) | 7.011(17)                                                                                      | 7.007(6)                                                                                       | 6.881(9)                                                                                       | 6.801(17)                                                                                      |
|                                                   | b (Å) | 25.05(2)                                                                                       | 25.170(15)                                                                                     | 25.14(3)                                                                                       | 25.11(6)                                                                                       |
|                                                   | c (Å) | 28.81(5)                                                                                       | 28.46(19)                                                                                      | 28.2(3)                                                                                        | 27.98(8)                                                                                       |
| Volume (Å <sup>3</sup> )                          |       | 5059(16)                                                                                       | 5019(34)                                                                                       | 4871(51)                                                                                       | 4813(20)                                                                                       |
| Z/Z'                                              |       | 4/1                                                                                            | 4/1                                                                                            | 4/1                                                                                            | 4/1                                                                                            |
| Molecular volume (V/Z)                            |       | 1264.75                                                                                        | 1254.75                                                                                        | 1217.75                                                                                        | 1203.25                                                                                        |
| Calculated density (g/cm <sup>3</sup> )           |       | -                                                                                              | 1.096                                                                                          | 1.129                                                                                          | -                                                                                              |
| Absorption (mm <sup>-1</sup> )                    |       | -                                                                                              | 0.627                                                                                          | 0.646                                                                                          | -                                                                                              |
| F(000)                                            |       | -                                                                                              | 1680.0                                                                                         | 1680.0                                                                                         | -                                                                                              |
| Crystal size (mm)                                 |       | 0.232 × 0.183 × 0.11                                                                           | 0.232 × 0.183 × 0.11                                                                           | 0.232 × 0.183 × 0.11                                                                           | 0.232 × 0.183 × 0.11                                                                           |
| 2θ-range for data collection (°)                  |       | -                                                                                              | 8.102 to 24.034                                                                                | 8.028 to 22.828                                                                                | -                                                                                              |
| Min/max indices: h, k, l                          |       | -                                                                                              | -4/4, -14/14, -6/6                                                                             | -3/3, -14/14, -7/7                                                                             | -                                                                                              |
| Reflect. collected/unique                         |       | -                                                                                              | 5280/434                                                                                       | 4756/399                                                                                       | -                                                                                              |
| R <sub>int</sub>                                  |       | -                                                                                              | 0.5890                                                                                         | 0.8895                                                                                         | -                                                                                              |
| Refinement method                                 |       | Full-matrix least-squares on F <sup>2</sup>                                                    |                                                                                                |                                                                                                |                                                                                                |
| Completeness (%)                                  |       | -                                                                                              | 41                                                                                             | 46                                                                                             | -                                                                                              |
| Data/restraints/parameters                        |       | -                                                                                              | 434/88/90                                                                                      | 399/102/90                                                                                     | -                                                                                              |
| Goodness-of-fit on F <sup>2</sup>                 |       | -                                                                                              | 1.074                                                                                          | 1.029                                                                                          | -                                                                                              |
| Final R <sub>1</sub> /wR <sub>2</sub> [(I>2σ(I))] |       | -                                                                                              | 0.1234/0.2840                                                                                  | 0.1387/0.3305                                                                                  | -                                                                                              |
| R <sub>1</sub> /wR <sub>2</sub> (all data)        |       | -                                                                                              | 0.1766/0.3380                                                                                  | 0.2365/0.4268                                                                                  | -                                                                                              |
| Largest diff. peak/hole (e Å <sup>-3</sup> )      |       | -                                                                                              | 0.18/-0.17                                                                                     | 0.18/-0.18                                                                                     | -                                                                                              |

crystallographic data of Daphne 7474 with their

$$w=1/(\sigma^2 F_o^2+w_1^2*P^2+w_2*P), \text{ where } P=(\text{Max}(F_o^2,0)+2*F_c^2)$$

**Table S5.**  
crystallographic  
compressed in  
deposited CCDC

| Pressure                                          | 0.1 MPa                                                                                        | 0.25 GPa                                                                                       | 0.56 GPa                                                                                       | 0.85 GPa                                                                                       | 1.18 GPa                                                                                       |
|---------------------------------------------------|------------------------------------------------------------------------------------------------|------------------------------------------------------------------------------------------------|------------------------------------------------------------------------------------------------|------------------------------------------------------------------------------------------------|------------------------------------------------------------------------------------------------|
| Hydrostatic medium                                | -                                                                                              | Methanol:ethanol:water                                                                         | Methanol:ethanol:water                                                                         | Methanol:ethanol:water                                                                         | Methanol:ethanol:water                                                                         |
| CCDC numbers                                      | 1956193                                                                                        | 1956826                                                                                        | 1956824                                                                                        | 1956823                                                                                        | 1956825                                                                                        |
| Formula weight                                    | 900.18                                                                                         | 828.09                                                                                         | 828.09                                                                                         | 828.09                                                                                         | 828.09                                                                                         |
| Empirical formula                                 | C <sub>42</sub> H <sub>30</sub> F <sub>6</sub> N <sub>3</sub> O <sub>5</sub> S <sub>2</sub> Zn | C <sub>39</sub> H <sub>24</sub> F <sub>6</sub> N <sub>2</sub> O <sub>4</sub> S <sub>2</sub> Zn | C <sub>39</sub> H <sub>24</sub> F <sub>6</sub> N <sub>2</sub> O <sub>4</sub> S <sub>2</sub> Zn | C <sub>39</sub> H <sub>24</sub> F <sub>6</sub> N <sub>2</sub> O <sub>4</sub> S <sub>2</sub> Zn | C <sub>39</sub> H <sub>24</sub> F <sub>6</sub> N <sub>2</sub> O <sub>4</sub> S <sub>2</sub> Zn |
| Wavelength (Å)                                    | 1.54184                                                                                        | 0.71073                                                                                        | 0.71073                                                                                        | 0.71073                                                                                        | 0.71073                                                                                        |
| Crystal system                                    | orthorhombic                                                                                   | orthorhombic                                                                                   | orthorhombic                                                                                   | orthorhombic                                                                                   | orthorhombic                                                                                   |
| Space group                                       | <i>P</i> 2 <sub>1</sub> 2 <sub>1</sub> 2 <sub>1</sub>                                          |
| Unit cell dimensions                              | a (Å)                                                                                          | 7.11393(12)                                                                                    | 7.1001(8)                                                                                      | 7.1015(18)                                                                                     | 7.072(4)                                                                                       |
|                                                   | b (Å)                                                                                          | 24.9253(4)                                                                                     | 24.68(2)                                                                                       | 24.22(3)                                                                                       | 24.225(15)                                                                                     |
|                                                   | c (Å)                                                                                          | 29.0241(8)                                                                                     | 29.899(7)                                                                                      | 30.248(17)                                                                                     | 30.38(5)                                                                                       |
| Volume (Å <sup>3</sup> )                          | 5146.45(19)                                                                                    | 5240(5)                                                                                        | 5202(8)                                                                                        | 5205(10)                                                                                       | 5181(8)                                                                                        |
| Z/Z'                                              | 4/1                                                                                            | 4/1                                                                                            | 4/1                                                                                            | 4/1                                                                                            | 4/1                                                                                            |
| Molecular volume (V/Z)                            | 1286.61                                                                                        | 1310.0                                                                                         | 1300.5                                                                                         | 1301.25                                                                                        | 1295.25                                                                                        |
| Calculated density (g/cm <sup>3</sup> )           | 1.162                                                                                          | 1.050                                                                                          | 1.057                                                                                          | 1.057                                                                                          | 1.062                                                                                          |
| Absorption (mm <sup>-1</sup> )                    | 1.947                                                                                          | 0.600                                                                                          | 0.605                                                                                          | 0.604                                                                                          | 0.607                                                                                          |
| F(000)                                            | 1836.0                                                                                         | 1680.0                                                                                         | 1680.0                                                                                         | 1680.0                                                                                         | 1680.0                                                                                         |
| Crystal size (mm)                                 | 0.307 × 0.213 × 0.127                                                                          | 0.303 × 0.135 × 0.063                                                                          | 0.234 × 0.084 × 0.052                                                                          | 0.302 × 0.137 × 0.063                                                                          | 0.234 × 0.084 × 0.052                                                                          |
| 2θ-range for data collection (°)                  | 7.048 to 155.29                                                                                | 4.408 to 46.498                                                                                | 4.376 to 41.632                                                                                | 8.394 to 20.458                                                                                | 8.15 to 29.386                                                                                 |
| Min/max indices: h, k, l                          | -8/8, -31/18, -35/36                                                                           | -7/7, -16/17, -32/32                                                                           | -7/7, -17/18, -28/29                                                                           | -3/3, -11/12, -12/11                                                                           | -5/5, -16/17, -15/15                                                                           |
| Reflect. collected/unique                         | 44199/10708                                                                                    | 26565/4239                                                                                     | 20936/3431                                                                                     | 3350/446                                                                                       | 9614 /1221                                                                                     |
| R <sub>int</sub>                                  | 0.0374                                                                                         | 0.3620                                                                                         | 0.3619                                                                                         | 0.1889                                                                                         | 0.3500                                                                                         |
| Refinement method                                 | Full-matrix least-squares on F <sup>2</sup>                                                    |                                                                                                |                                                                                                |                                                                                                |                                                                                                |
| Completeness (%)                                  | 100                                                                                            | 54                                                                                             | 64                                                                                             | 67                                                                                             | 65                                                                                             |
| Data/restraints/parameters                        | 10708/123/565                                                                                  | 4239/719/414                                                                                   | 3431/768/414                                                                                   | 446/57/91                                                                                      | 1221/144/91                                                                                    |
| Goodness-of-fit on F <sup>2</sup>                 | 1.660                                                                                          | 1.057                                                                                          | 1.098                                                                                          | 1.168                                                                                          | 1.593                                                                                          |
| Final R <sub>1</sub> /wR <sub>2</sub> [(I>2σ(I))] | 0.1227/ 0.3691                                                                                 | 0.1470/0.3636                                                                                  | 0.1391/ 0.3428                                                                                 | 0.1023/ 0.2449                                                                                 | 0.1710/0.4073                                                                                  |
| R <sub>1</sub> /wR <sub>2</sub> (all data)        | 0.1330/0.3851                                                                                  | 0.3584/0.4778                                                                                  | 0.3125/ 0.4536                                                                                 | 0.1386/0.2875                                                                                  | 0.2384/0.4798                                                                                  |
| Largest diff. peak/hole (e Å <sup>-3</sup> )      | 1.34/-1.13                                                                                     | 0.29/-0.47                                                                                     | 0.43/-0.48                                                                                     | 0.27/-0.29                                                                                     | 0.52/-0.50                                                                                     |

$$w=1/(\sigma^2 F_o^2+w_1^2 * P^2+w_2 * P), \text{ where } P=(\text{Max}(F_o^2,0)+2 * F_c^2)$$

Detailed  
data of DMOF  
MEW with their  
numbers.
